# Supplementary material for: Modulating energetic performance through decorating nitrogen-rich ligands in high-energy MOFs
Source: Royal Society of Chemistry journal article supplement (doi:10.1039/c9dt04803k), 2020-01-01
Supplement: c9dt04803k4.pdf [file c9dt04803k4.pdf]

## Supporting Information

### Modulating energetic performance through decorating the nitrogen-rich ligands in high-energy MOFs

Senni Cao,<sup>a#</sup> Xiufang Ma,<sup>a#</sup> Xiaohui Ma,<sup>a</sup> Peipei Cen,<sup>b</sup> Yuewei Wu,<sup>a</sup> Jinhui Yang<sup>a</sup>, Xiangyu Liu<sup>a\*</sup>  
Gang Xie<sup>c</sup> and Sanping Chen<sup>c\*</sup>

<sup>a</sup> State Key Laboratory of High-efficiency Utilization of Coal and Green Chemical Engineering, National Demonstration Center for Experimental Chemistry Education, College of Chemistry and Chemical Engineering, Ningxia University, Yinchuan 750021, China

<sup>b</sup> College of Public Health and Management, Ningxia Medical University, Yinchuan 750021, China

<sup>c</sup> Key Laboratory of Synthetic and Natural Functional Molecule Chemistry of Ministry of Education, College of Chemistry and Materials Science, Northwest University, Xi'an 710069, China

# These authors contributed equally to this work

#### Contents

**Table S1** Selected crystallographic data and structural refinement for compounds **1** and **2**.

**Table S2** Selected bond lengths [Å] and bond angles [°] for **1**(left) and **2** (right).

**Fig. S1.** 3D supramolecular network formed by several 2D layers in **1** (left) and **2** (right).

**Fig. S2** PXRD patterns for compounds **1** (left) and **2** (right).

**Fig. S3.** DSC curves of **1** and **2**.

#### \*Corresponding author

**Dr. Xiangyu Liu**

**Tel.: +86-951-2062004**

**Fax: +86-951-2062860**

**E-mail: xiangyuliu432@126.com**

#### \*Corresponding author

**Dr. Sanping Chen**

**E-mail: sanpingchen@126.com**

**Table S1** Selected crystallographic data and structural refinement for compounds **1** and **2**

|                                             | <b>1</b>                                                      | <b>2</b>                                                      |
|---------------------------------------------|---------------------------------------------------------------|---------------------------------------------------------------|
| Empirical formula                           | C <sub>3</sub> H <sub>4</sub> AgN <sub>4</sub> O <sub>2</sub> | C <sub>3</sub> H <sub>4</sub> AgN <sub>5</sub> O <sub>2</sub> |
| Formula weight                              | 235.97                                                        | 249.98                                                        |
| Temperature/K                               | 293(2)                                                        | 293(2)                                                        |
| Crystal system                              | monoclinic                                                    | monoclinic                                                    |
| Space group                                 | P2 <sub>1</sub> /c                                            | P2 <sub>1</sub> /c                                            |
| <i>a</i> (Å)                                | 8.8458(15)                                                    | 4.2779(9)                                                     |
| <i>b</i> (Å)                                | 6.0291(10)                                                    | 10.937(2)                                                     |
| <i>c</i> (Å)                                | 10.7271(18)                                                   | 14.054(3)                                                     |
| $\alpha$ (°)                                | 90                                                            | 90                                                            |
| $\beta$ (°)                                 | 104.815                                                       | 105.837(8)                                                    |
| $\gamma$ (°)                                | 90                                                            | 90                                                            |
| <i>V</i> (Å <sup>3</sup> )                  | 553.08                                                        | 632.6(2)                                                      |
| <i>Z</i>                                    | 4                                                             | 4                                                             |
| <i>D</i> (Mg/m <sup>3</sup> )               | 2.834                                                         | 2.625                                                         |
| $\mu$ (mm <sup>-1</sup> )                   | 3.573                                                         | 3.136                                                         |
| Unique reflections                          | 1364                                                          | 1113                                                          |
| Observed reflections                        | 1539                                                          | 10565                                                         |
| <i>R</i> <sub>int</sub>                     | 0.0771                                                        | 0.0690                                                        |
| R <sub>1</sub> [ <i>I</i> > 2σ( <i>I</i> )] | R1 = 0.0562, wR2 = 0.1342                                     | R <sub>1</sub> = 0.1073, wR <sub>2</sub> = 0.2834             |
| wR <sub>2</sub> (all data)                  | R1 = 0.0636, wR2 = 0.1397                                     | R <sub>1</sub> = 0.1143, wR <sub>2</sub> = 0.2886             |

**Table S2** Selected bond lengths [Å] and bond angles [°] for **1** and **2**

|                     | <b>1</b> |                     | <b>2</b>  |
|---------------------|----------|---------------------|-----------|
| Ag(1)-N(2)          | 2.199(7) | Ag(1)-O(1)#5        | 2.265(13) |
| Ag(1)-N(3)#1        | 2.219(7) | Ag(1)-N(1)          | 2.200(14) |
| Ag(1)-O(1)#2        | 2.568(6) | Ag(1)-N(2)#7        | 2.322(14) |
| Ag(1)-N(4)#3        | 2.370(7) | O(1)-Ag(1)#2        | 2.265(13) |
| N(2)-Ag(1)-N(3)#1   | 137.3(2) | N(2)-Ag(1)#7        | 2.322(14) |
| N(2)-Ag(1)-O(1)#2   | 90.3(2)  | O(1)#1-Ag(1)-N(2)#7 | 104.5(5)  |
| N(2)-Ag(1)-N(4)#3   | 113.4(2) | N(1)-Ag(1)-O(1)#5   | 138.1(5)  |
| N(3)#1-Ag(1)-O(1)#2 | 113.1(2) | N(1)-Ag(1)-N(2)#7   | 117.3(5)  |
| N(3)#1-Ag(1)-N(4)#3 | 104.4(2) | C(3)-O(1)-Ag(1)#2   | 111.7(11) |
| N(4)#3-Ag(1)-O(1)#2 | 83.9(2)  | N(2)-N(1)-Ag(1)     | 121.9(10) |
| N(3)-N(2)-Ag(1)     | 122.0(5) | C(1)-N(1)-Ag(1)     | 130.3(12) |
| N(1)-N(2)-Ag(1)     | 132.1(5) | N(1)-N(2)-Ag(1)#7   | 119.9(10) |
| N(2)-N(3)-Ag(1)#4   | 122.6(5) | N(3)-N(2)-Ag(1)#7   | 128.6(11) |
| N(4)-N(3)-Ag(1)#4   | 122.6(5) | C(1)-N(4)-C(2)      | 127.9(14) |
| C(1)-O(1)-Ag(1)#5   | 2.370(7) | O(1)- C(3)-C(2)     | 117.9(14) |
| N(3)-N(4)-Ag(1)#6   | 127.4(5) | N(2)-N(3)-N(4)      | 105.2(14) |
| C(3)-N(4)-Ag(1)#6   | 122.9(5) | N(1)-C(1)-N(4)      | 106.0(14) |

#1 -x+1, y+1/2, -z+1/2 ; #2 x, -y+3/2, z-1/2 ; #3 x, -y+1/2, z-1/2; #4 -x+1, y-1/2, -z+1/2 ; #5 x, -y+3/2, z+1/2;  
#6 x, -y+1/2, z+1/2 ; #7 - x, 1- y, 1-z

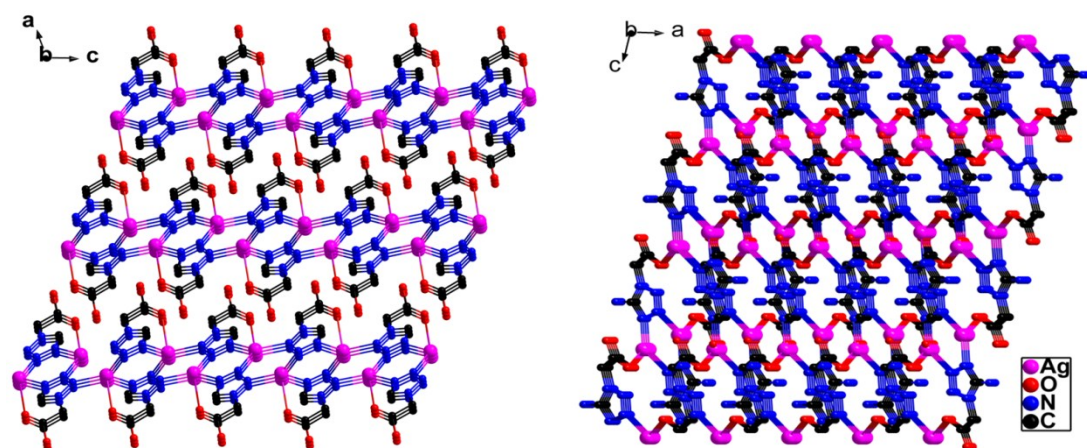

**Fig. S1.** 3D supramolecular network formed by several 2D layers in **1** (left) and **2** (right). (Hydrogen atoms are omitted for clarity).

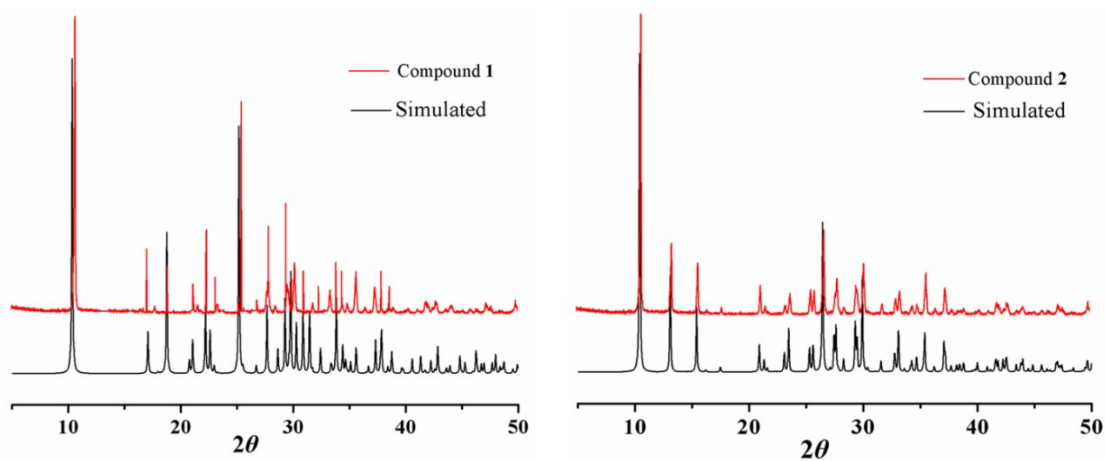

**Fig. S2.** PXRD patterns for compounds **1** (left) and **2** (right).

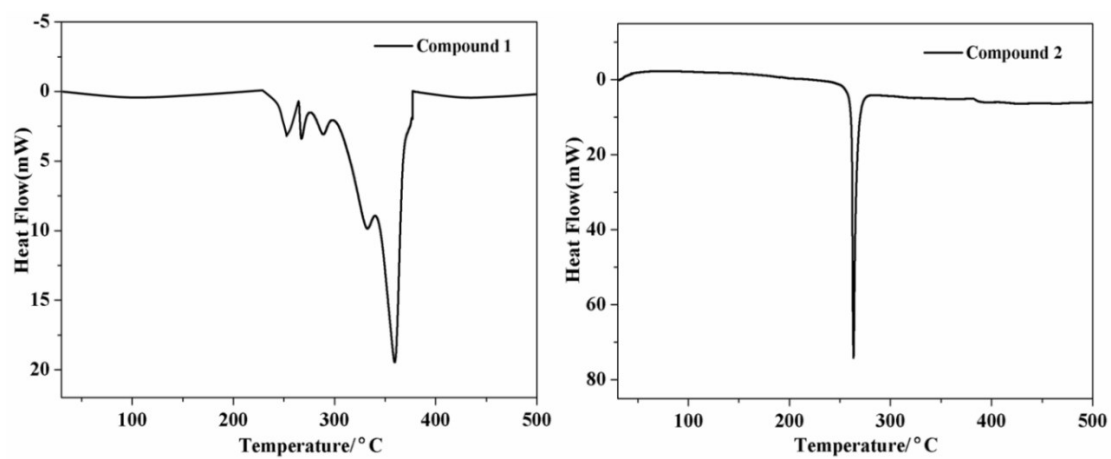

**Fig. S3.** DSC curves of **1** (left) and **2** (right).
