# Supplementary figures and images for: Modulating energetic performance through decorating nitrogen-rich ligands in high-energy MOFs
Source: Royal Society of Chemistry journal article supplement (doi:10.1039/c9dt04803k), 2020-01-01

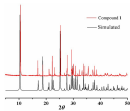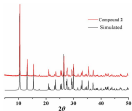

Supplement: c9dt04803k2.pdf [file c9dt04803k2.pdf]
